# Supplementary material
Source: PubMed Central journal article supplement (PMC5610401)
Supplement: Supp_Fig1.pdf [file Supp_Fig1.pdf]

Roll A vs Roll D;  $p < 0.05$

Rolls B and C vs Roll D;  $p < 0.05$

Roll A vs Rolls B and C;  $p < 0.05$

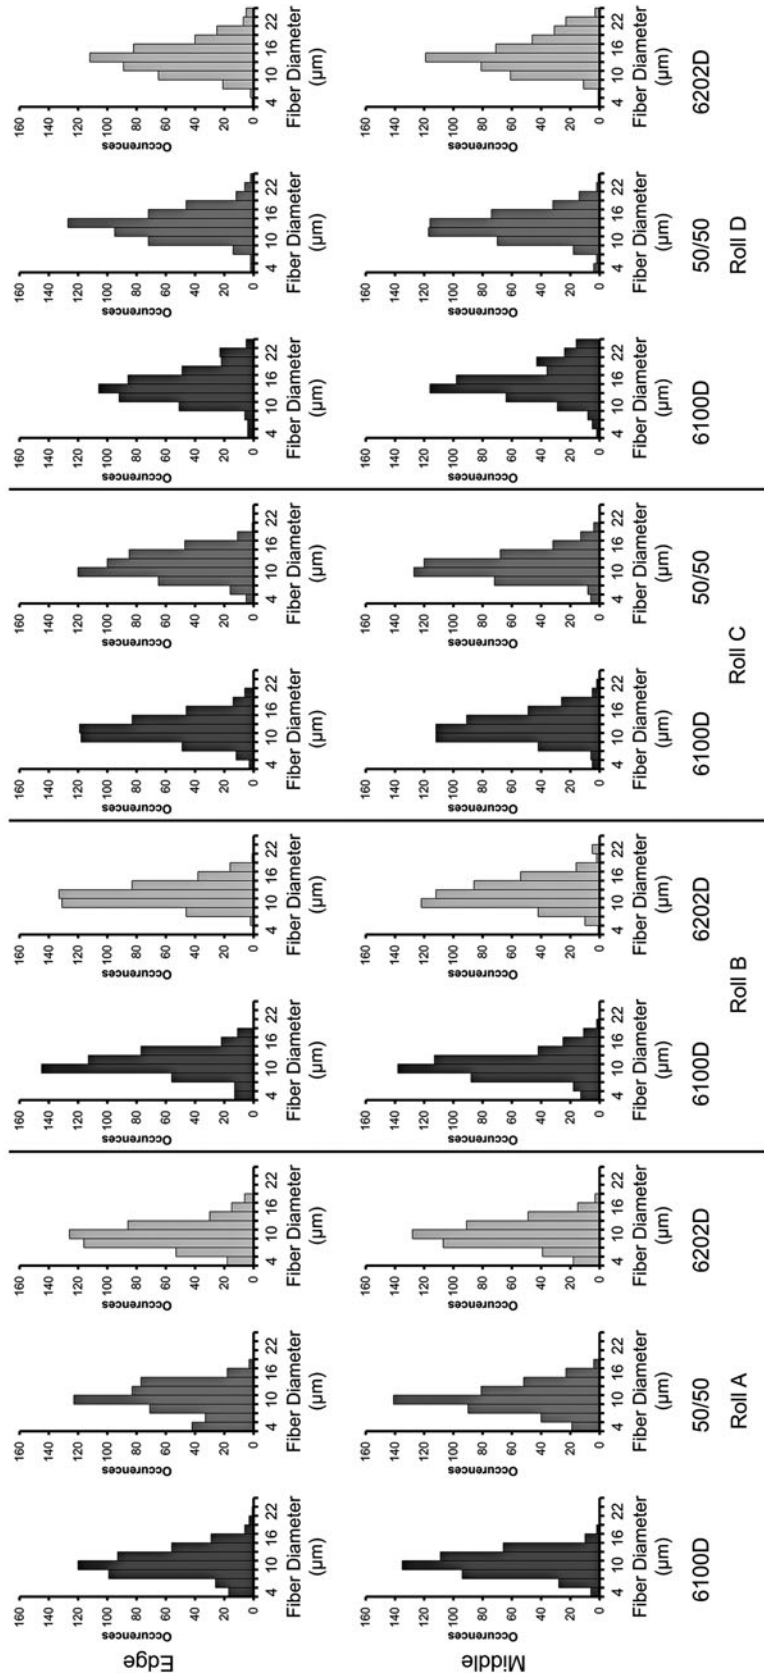

**SUPPLEMENTARY FIG. S1.** Fiber diameters represented by histograms with 2 µm bins over a range of 4–24 µm from the edge and middle of each sheet of meltblown fabric ( $n = 3$ , 3 images/scaffold, 50 fibers/image).  $p$ -values marked above histograms represent significant difference between rolls (Kruskal–Wallis Test).
