# Supplementary material
Source: PubMed Central journal article supplement (PMC5610401)
Supplement: Supp_Fig2.pdf [file Supp_Fig2.pdf]

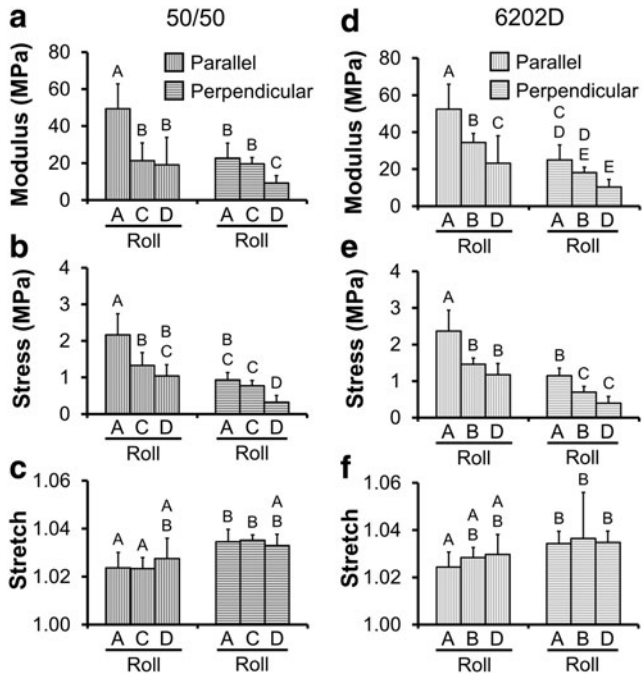

**SUPPLEMENTARY FIG. S2.** Mean  $\pm$  SD Young's modulus (a) yield stress (b), and yield stretch (c) in 50/50 6100/6202D PLA meltblown scaffolds and mean  $\pm$  SD Young's modulus (d) yield stress (e), and yield stretch (f) in 6202D PLA meltblown scaffolds tested in orthogonal directions,  $n=6$ . Groups with *different letters* above are significantly different from each other (ANOVA,  $p < 0.05$ ). PLA, poly(lactic acid); SD, standard deviation.
