# Supplementary material
Source: PubMed Central journal article supplement (PMC5610401)
Supplement: Supp_Fig3.pdf [file Supp_Fig3.pdf]

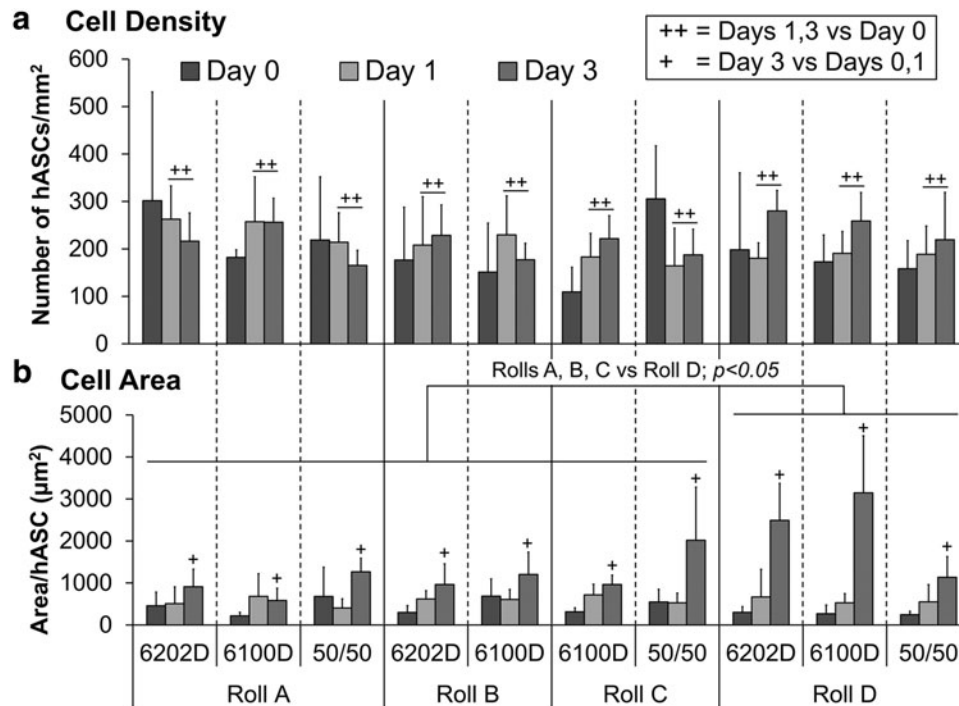

**SUPPLEMENTARY FIG. S3.** Mean  $\pm$  SD cell density (**a**) and single cell area (**b**) ( $n > 10$  cells/image; six images per scaffold) of human adipose stem cells cultured for 0 (harvested at 4 h), 1, and 3 days on meltblown scaffolds of various poly(lactic acid) crystallinities from various rolls, each roll produced with different machine settings ( $n = 2$ , measurements from three images [ $0.3 \text{ mm}^2$ ] per scaffold). ++Difference between days 1 and 3 and day 0. +Difference between day 3 and days 0 and 1. *p*-values marked above bars represent difference between rolls (ANOVA).
