# Supplementary material
Source: PubMed Central journal article supplement (PMC5610401)
Supplement: Supp_Table1.pdf [file Supp_Table1.pdf]

SUPPLEMENTARY TABLE S1. MELTBLOWN FABRIC THICKNESS ( $N=6$ ) IN MM  
FOR EACH ROLL AND POLY(LACTIC ACID) CRYSTALLINITY

| Scaffold Thickness (mm) |        |       |       |        |       |        |       |        |       |       |
|-------------------------|--------|-------|-------|--------|-------|--------|-------|--------|-------|-------|
|                         | Roll A |       |       | Roll B |       | Roll C |       | Roll D |       |       |
|                         | 6100D  | 50/50 | 6202D | 6100D  | 6202D | 6100D  | 50/50 | 6100D  | 50/50 | 6202D |
| Mean                    | 0.255  | 0.292 | 0.274 | 0.252  | 0.274 | 0.285  | 0.275 | 0.305  | 0.269 | 0.294 |
| SD                      | 0.022  | 0.020 | 0.035 | 0.026  | 0.041 | 0.044  | 0.020 | 0.045  | 0.031 | 0.044 |

There was a trend toward increased thickness for Roll D compared with other rolls ( $p=0.0535$ ) but no effect of polymer crystallinity ( $p=0.9609$ ) (ANOVA). ANOVA, analysis of variance.
